# Supplementary material for: A label-free H1N1 influenza virus immunosensor based on an N-LIG/Au laser induced graphene microelectrode
Source: Royal Society of Chemistry journal article supplement (doi:10.1039/d4ay01016g), 2024-01-01
Supplement: d4ay01016g1.pdf [file d4ay01016g1.pdf]

*-Supporting information-*

## Label-free H1N1 immunosensor based on N-LIG/Au laser induced graphene microelectrode

Yuchen Zhou<sup>1,2</sup>, Wanchun Chen<sup>2</sup>, Guangyuan Wang<sup>2</sup>, Zhenfeng Lei<sup>2</sup>, Mei Zhang<sup>2\*</sup>, Yanxia Li<sup>2\*</sup>

1. College of Chemistry and Materials Science, Fujian Normal University, Fuzhou 350108, China
2. College of Materials and Chemical Engineering, Minjiang University, Fuzhou 350108, China

E-mail address:yxli09@163.com; Tel/Fax: +86 13665034805

## 1. Comparison of different detection methods

Table S1. Comparison of H1N1 detection between different sensors

| No. | Method                                                                                       | Material                                                                                             | Linear Range (fg mL <sup>-1</sup> ) | LOD (fg mL <sup>-1</sup> ) | Merits                                                                                 | Shortcomings                                                  | References                      |
|-----|----------------------------------------------------------------------------------------------|------------------------------------------------------------------------------------------------------|-------------------------------------|----------------------------|----------------------------------------------------------------------------------------|---------------------------------------------------------------|---------------------------------|
| 1   | Fluorescence Immunoassay based on magnetic multifunctional nanospheres                       | Pst-AAm-COOH <sup>a</sup> / $\gamma$ -Fe <sub>2</sub> O <sub>3</sub> @ CdSe/ZnS QDs <sup>b</sup> /Ab | 20~3500                             | 20                         | Simultaneous detection; Ultrasensitive quantitative, specificity and anti-interference | Complex operation; Small detection range                      | Wu et al. 2019 <sup>1</sup>     |
| 2   | A nanocarrier chromogenic sandwich immunosensor based on signal amplification                | PNLNs (TP@PNLNs) <sup>c</sup> /Ab1/H1N1/Ab2/ MNPs <sup>d</sup>                                       | 10~10 <sup>6</sup>                  | 27.56                      | Recognition of multiple viruses; Excellent specificity                                 | Few selective samples; Complex operation                      | Khoris et al. 2021 <sup>2</sup> |
| 3   | Fluoroimmunoassay based on S-gCNQDs <sup>e</sup> coupled with Ag <sub>2</sub> S nanocrystals | S-gCNQDs/Ab1/ H1N1/Ab2/ Ag <sub>2</sub> S NCs <sup>f</sup>                                           | 10~10 <sup>6</sup>                  | 5.5                        | Rapid, convenient, and versatile; Highly sensitive and selective                       | Complex operation; Analysis without complex biological sample | Achadu et al. 2020 <sup>3</sup> |

|   |                                                                                         |                                                        |                      |       |                                                                                                                  |                                           |                              |
|---|-----------------------------------------------------------------------------------------|--------------------------------------------------------|----------------------|-------|------------------------------------------------------------------------------------------------------------------|-------------------------------------------|------------------------------|
| 4 | A electrochemical biosensors based on polyUiO-66@AgNPs <sup>g</sup>                     | polyUiO-66@AgNPs/Ab                                    | 100~10 <sup>9</sup>  | 54.7  | High selectivity, good stability, excellent reproducibility and acceptable regenerability                        | LOD not low                               | Jia et al. 2021 <sup>4</sup> |
| 5 | A magnetofluoro-immunosensing platform based on dual-functional plasmomagnetic graphene | Graphene @Au NPs @GA-IONPs <sup>h</sup> /HA Ab/H1N1/QD | 1~10 <sup>4</sup>    | 7.27  | High selectivity; Excellent sensitivity; A potential biosensing and diagnostic platform                          | Complex operation; Small detection range; | Lee et al. 2018 <sup>5</sup> |
| 6 | An electrochemical immunosensor based on N-LIG <sup>i</sup>                             | N-LIG/Au/MUA /Ab/H1N1                                  | 0.01~10 <sup>7</sup> | 0.004 | Wide detection range; flexibility; High selectivity and <u>excellent-good</u> sensitivity; Simple immune process | Un-reproducibility;                       | This work                    |

a Pst-AAm-COOH: Poly(styrene/acrylamide) nanospheres; b QDs: Quantum dots; c PNLNs (TP@PNLNs): PP-encapsulated polymeric nanoparticle-laden nanocarriers; d MNPs: Magnetic nanoparticles; e S-gCNQDs: Sulfur-doped graphitic carbon nitride quantum dots; f NCs: nanocrystals; g polyUiO-66@AgNPs: Silver nanoparticle embedded polymer-zirconium-based metal-organic framework; h GA-IONPs: gallic acid-modified oxidizable iron oxides nanoparticles; i N-LIG: N doped laser-induced graphene.

## References:

1. Wu, Z.; Zeng, T.; Guo, W.-J.; Bai, Y.-Y.; Pang, D.-W.; Zhang, Z.-L., Digital Single Virus Immunoassay for Ultrasensitive Multiplex Avian Influenza Virus Detection Based on Fluorescent Magnetic Multifunctional Nanospheres. *ACS Applied Materials & Interfaces* **2019**, *11* (6), 5762-5770.
2. Khoris, I. M.; Ganganboina, A. B.; Park, E. Y., Self-Assembled Chromogenic Polymeric Nanoparticle-Laden Nanocarrier as a Signal Carrier for Derivative Binary Responsive Virus Detection. *ACS Applied Materials & Interfaces* **2021**, *13* (31), 36868-36879.
3. Achadu, O. J.; Lioe, D. X.; Kagawa, K.; Kawahito, S.; Park, E. Y., Fluoroimmunoassay of influenza virus using sulfur-doped graphitic carbon nitride quantum dots coupled with Ag<sub>2</sub>S nanocrystals. *Microchimica Acta* **2020**, *187* (8), 466.
4. Jia, Q.; Lou, Y.; Rong, F.; Zhang, S.; Wang, M.; He, L.; Zhang, Z.; Du, M., Silver nanoparticle embedded polymer–zirconium-based metal–organic framework (polyUiO-66) for electrochemical biosensors of respiratory viruses. *Journal of Materials Chemistry C* **2021**, *9* (40), 14190-14200.
5. Lee, J.; Takemura, K.; Park, E. Y., Plasmonic/magnetic graphene-based magnetofluoro-immunosensing platform for virus detection. *Sensors and Actuators B: Chemical* **2018**, *276*, 254-261.
